# Supplementary material
Source: HighWire-hosted journal article supplement (https://bmjopen.bmj.com/content/13/6/e068368)
Supplement: inline-supplementary-material-1 [file inline-supplementary-material-1.pdf]

**Supplementary Table 1: PRISMA-P (Preferred Reporting Items for Systematic review and Meta-Analysis Protocols) 2015 checklist: recommended items to address in a systematic review protocol\***

| Section and Topic          | Item No | Checklist item                                                                                                                                                                                  | Page No.                 |
|----------------------------|---------|-------------------------------------------------------------------------------------------------------------------------------------------------------------------------------------------------|--------------------------|
| Administrative information |         |                                                                                                                                                                                                 |                          |
| <b>Title:</b>              |         |                                                                                                                                                                                                 |                          |
| Identification             | 1a      | Identify the report as a protocol of a systematic review                                                                                                                                        | 1                        |
| Update                     | 1b      | If the protocol is for an update of a previous systematic review, identify as such                                                                                                              | N/A                      |
| Registration               | 2       | If registered, provide the name of the registry (such as PROSPERO) and registration number                                                                                                      | PROSPERO(CRD42020155694) |
| <b>Authors:</b>            |         |                                                                                                                                                                                                 |                          |
| Contact                    | 3a      | Provide name, institutional affiliation, e-mail address of all protocol authors; provide physical mailing address of corresponding author                                                       | 1                        |
| Contributions              | 3b      | Describe contributions of protocol authors and identify the guarantor of the review                                                                                                             | 9                        |
| Amendments                 | 4       | If the protocol represents an amendment of a previously completed or published protocol, identify as such and list changes; otherwise, state plan for documenting important protocol amendments | N/A                      |
| <b>Support:</b>            |         |                                                                                                                                                                                                 |                          |
| Sources                    | 5a      | Indicate sources of financial or other support for the review                                                                                                                                   | N/A                      |
| Sponsor                    | 5b      | Provide name for the review funder and/or sponsor                                                                                                                                               | N/A                      |
| Role of sponsor or funder  | 5c      | Describe roles of funder(s), sponsor(s), and/or institution(s), if any, in developing the protocol                                                                                              | N/A                      |
| <b>Introduction:</b>       |         |                                                                                                                                                                                                 |                          |

|                         |     |                                                                                                                                                                                                                                    |                       |
|-------------------------|-----|------------------------------------------------------------------------------------------------------------------------------------------------------------------------------------------------------------------------------------|-----------------------|
| Rationale               | 6   | Describe the rationale for the review in the context of what is already known                                                                                                                                                      | 4                     |
| Objectives              | 7   | Provide an explicit statement of the question(s) the review will address with reference to participants, interventions/exposures, comparators, and outcomes (PICO/PECO)                                                            | 4                     |
| <b>Methods:</b>         |     |                                                                                                                                                                                                                                    |                       |
| Eligibility criteria    | 8   | Specify the study characteristics (such as PICO/PECO, study design, setting, time frame) and report characteristics (such as years considered, language, publication status) to be used as criteria for eligibility for the review | 5                     |
| Information sources     | 9   | Describe all intended information sources (such as electronic databases, contact with study authors, trial registers or other grey literature sources) with planned dates of coverage                                              | 5                     |
| Search strategy         | 10  | Present draft of search strategy to be used for at least one electronic database, including planned limits, such that it could be repeated                                                                                         | Supplementary Table 2 |
| Study records:          |     |                                                                                                                                                                                                                                    |                       |
| Data management         | 11a | Describe the mechanism(s) that will be used to manage records and data throughout the review                                                                                                                                       | 6-7                   |
| Selection process       | 11b | State the process that will be used for selecting studies (such as two independent reviewers) through each phase of the review (that is, screening, eligibility and inclusion in meta-analysis)                                    | 5-6                   |
| Data collection process | 11c | Describe planned method of extracting data from reports (such as piloting forms, done independently, in duplicate), any processes for obtaining and confirming data from investigators                                             | 6-7                   |
| Data items              | 12  | List and define all variables for which data will be sought (such as PICO/PECO items, funding sources), any pre-planned data assumptions and simplifications                                                                       | 6                     |

|                                    |     |                                                                                                                                                                                                                                                           |     |
|------------------------------------|-----|-----------------------------------------------------------------------------------------------------------------------------------------------------------------------------------------------------------------------------------------------------------|-----|
| Outcomes and prioritization        | 13  | List and define all outcomes for which data will be sought, including prioritization of main and additional outcomes, with rationale                                                                                                                      | 6   |
| Risk of bias in individual studies | 14  | Describe anticipated methods for assessing risk of bias of individual studies, including whether this will be done at the outcome or study level, or both; state how this information will be used in data synthesis                                      | 7   |
| Data synthesis                     | 15a | Describe criteria under which study data will be quantitatively synthesised                                                                                                                                                                               | 7-8 |
|                                    | 15b | If data are appropriate for quantitative synthesis, describe planned summary measures, methods of handling data and methods of combining data from studies, including any planned exploration of consistency (such as I <sup>2</sup> , Kendall's $\tau$ ) | 7-8 |
|                                    | 15c | Describe any proposed additional analyses (such as sensitivity or subgroup analyses, meta-regression)                                                                                                                                                     | 8   |
|                                    | 15d | If quantitative synthesis is not appropriate, describe the type of summary planned                                                                                                                                                                        | 7-8 |
| Meta-bias(es)                      | 16  | Specify any planned assessment of meta-bias(es) (such as publication bias across studies, selective reporting within studies)                                                                                                                             | 7   |
| Confidence in cumulative evidence  | 17  | Describe how the strength of the body of evidence will be assessed (such as GRADE)                                                                                                                                                                        | 7   |

\*N/A- Not Applicable

**From: Shamseer L, Moher D, Clarke M, Ghersi D, Liberati A, Petticrew M, Shekelle P, Stewart L, PRISMA-P Group. Preferred reporting items for systematic review and meta-analysis protocols (PRISMA-P) 2015: elaboration and explanation. BMJ. 2015 Jan 2;349(jan02 1):g7647.**
