# Supplementary material
Source: HighWire-hosted journal article supplement (https://bmjopen.bmj.com/content/13/6/e068368)
Supplement: inline-supplementary-material-4 [file inline-supplementary-material-4.pdf]

Zhao Y, et al. *BMJ Open* 2023; 13:e068368. doi: 10.1136/bmjopen-2022-068368
